# Supplementary material for: Site-selective functionalization of plasmonic nanopores for enhanced fluorescence emission rate and Förster resonance energy transfer
Source: Royal Society of Chemistry journal article supplement (doi:10.1039/c9na00077a), 2019-01-01

## SUPPORTING INFORMATION:

### Site-selective functionalization of plasmonic nanopores for enhanced fluorescence emission rate and Förster Resonance Energy Transfer

Xavier Zambrana-Puyalto<sup>1</sup>, Nicolò Maccaferri<sup>1,2</sup>, Paolo Ponzellini<sup>1</sup>, Giorgia Giovannini<sup>1</sup>, Francesco De Angelis<sup>1</sup>, and Denis Garoli<sup>1,3\*</sup>

<sup>1</sup> Istituto Italiano di Tecnologia, via Morego 30, I-16163, Genova, Italy.

<sup>2</sup> Physics and Materials Science Research Unit, Université de Luxembourg, L-1511 Luxembourg, Luxembourg

<sup>3</sup> Ab Analitica, Via Svezzerà 13, 35027, Padova, Italy

\* Corresponding author: Dr. Denis Garoli, [denis.garoli@iit.it](mailto:denis.garoli@iit.it)

#### 1. Scattering cross sections of the four different families of nanopores

The scattering cross sections of the four different families of nanopores have been obtained using COMSOL Multiphysics. The scattering cross section is obtained as the integral of the projection of the Poynting vector along the normal direction of the surface of the scatterer. The scattered field has been obtained for the illumination used in the paper, *i.e.* a tightly focused Gaussian beam.

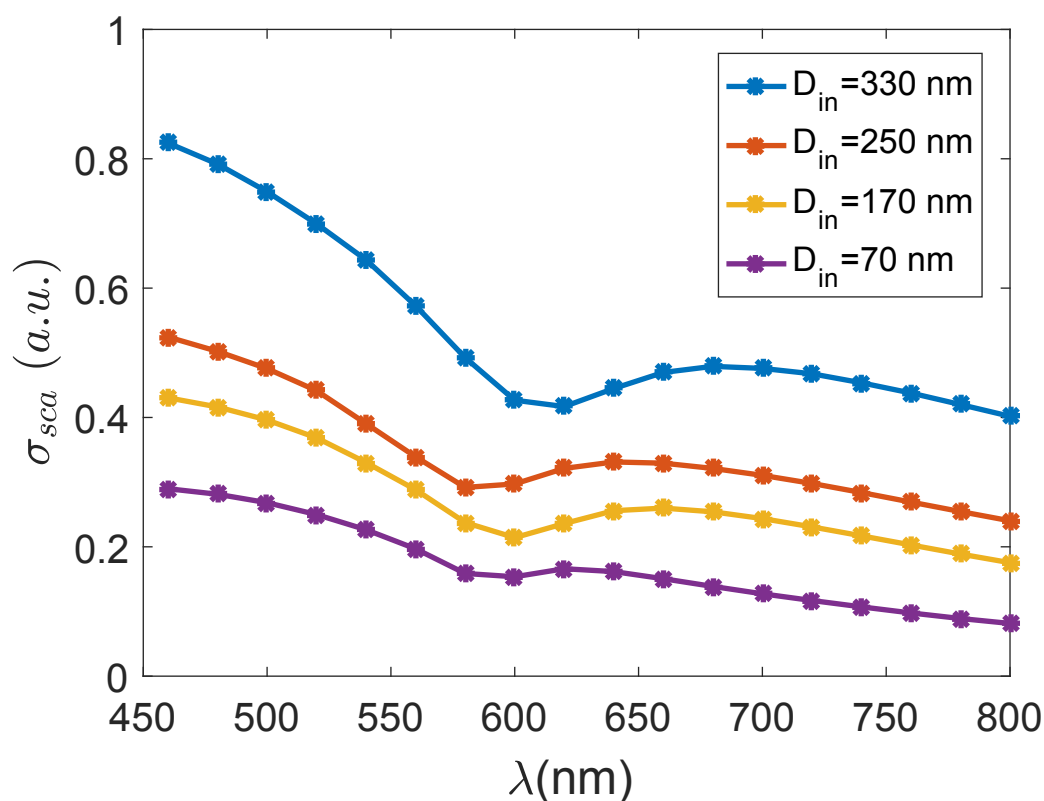

Supplement: c9na00077a1.pdf [file c9na00077a1.pdf]
